# Supplementary material
Source: publisher site journal article supplement (https://static.cambridge.org/content/id/urn:cambridge.org:id:article:S0962728600008873/resource/name/Maschat_et_al,_Appendix_Data_collection.pdf)
Supplement: Supplementary file 1 [file Maschat_et_al,_Appendix_Data_collection.pdf]

## 1 **Data collection**

2 Assessment was performed visually only at a distance of 0.50 m. When the evaluation  
3 of a parameter was not possible (manure on the body of the animal, sow not standing up),  
4 “NA” (not assessable) was recorded for the respective body region.

5 Examinations were carried out up to four times per farrowing period:

- 6 - day (D)1: on the day of moving the sows into the pens: 5 days before expected  
7 farrowing date (on group level); carried out on all batches of all farms
- 8 - D 2: during the first week after birth of piglets (on group level 4-7 days after  
9 farrowing); carried out on all batches of all farms
- 10 - D 3: during the third week after birth of piglets (on group level 17-20 days after  
11 farrowing); carried out on all batches of farms A and B and during long trial runs on  
12 farm C (13 out of 23 batches)
- 13 - D 4: during the fourth week after birth of piglets (on group level 25-28 days after  
14 farrowing); carried out during long trail runs on farm C (13 out of 23 batches)

15

16 Assessments were performed by a total of 11 trained observers who were assigned to  
17 one or two farms each. Observers were trained by one experienced observer (using photos,  
18 videos and direct observation) who also served as silver standard across three rounds of inter-  
19 observer reliability testing (before, during and after on-farm assessments). Minimum  
20 Prevalence and Bias Adjusted Kappa (PABAK) values ranged from 0.5 to 1.00 (according to  
21 Viera & Garrett (2005) moderate to perfect agreement) for all but one parameter (‘alterations  
22 of dew claws’, minimum PABAK 0.35), which was therefore excluded from further analysis.

23 Appendix 1, Table 1 shows definitions for all assessed parameters.

24

25

26

27 **Appendix 1, Table 1 Definitions of parameters of lesions (for all severity scores) in sows**

| Parameter                                   | Score 0                                                                                                                        | Score 1                                                                                                                                  | Score 2                                                                             |
|---------------------------------------------|--------------------------------------------------------------------------------------------------------------------------------|------------------------------------------------------------------------------------------------------------------------------------------|-------------------------------------------------------------------------------------|
| Shoulder sore                               | None                                                                                                                           | Clearly visible reddening;<br>≥ 3cm                                                                                                      | Broken skin/bleeding/ scab<br>Bleeding/scab; ≥ 3cm                                  |
| Injuries body                               | Clearly visible injuries (blood/scab) on head, ear, neck, shoulder, side, back, hindquarters, longitudinal ≥ 5 cm, round ≥ 3cm |                                                                                                                                          |                                                                                     |
|                                             | None                                                                                                                           | ≤ 3 injuries/region                                                                                                                      | > 3 injuries/region                                                                 |
| Injuries legs                               | Clearly visible injuries (blood/scab), 5 cm and above, longitudinal ≥ 5 cm, round ≥ 2cm                                        |                                                                                                                                          |                                                                                     |
|                                             | None                                                                                                                           | ≤ 3 injuries/region                                                                                                                      | > 3 injuries/region                                                                 |
| Injuries front/rear udder region            | Clearly visible injuries (blood/scab), longitudinal ≥ 5 cm, round ≥ 3 cm, separated in front/rear udder region                 |                                                                                                                                          |                                                                                     |
|                                             | None                                                                                                                           | ≤ 3 injuries/region                                                                                                                      | > 3 injuries per region or > 5 injuries ≥ 1cm                                       |
| Number of injured front/rear teats          | Number of clearly visible erythema and/or scabs; separated in front/hind teats                                                 |                                                                                                                                          |                                                                                     |
| Number of partial/missing front/rear teats  | Number of entirely missing and/or partially torn-off teats, blood/scab, separated in front/rear udder                          |                                                                                                                                          |                                                                                     |
| Swelling in region of front/rear udder      | None                                                                                                                           | Lump with minimal size of an egg visible                                                                                                 |                                                                                     |
| Injuries vulva                              | None                                                                                                                           | Injury (blood/scab) of arbitrary size visible                                                                                            |                                                                                     |
| Vulval scarring/missing parts               | None                                                                                                                           | Clearly deformed vulva (scarring, parts torn off or missing)                                                                             |                                                                                     |
| Swellings hind legs                         | None                                                                                                                           | Swellings ≥ 5 cm & with at least half-round shape („ball“, “size of a small mandarin”)                                                   |                                                                                     |
| Claw length (hind legs)                     | Normal                                                                                                                         | Claws too long (one claw clearly longer, claws crossed over, abnormal angle)                                                             |                                                                                     |
| Infection of claws/“panaritium“ (hind legs) | None                                                                                                                           | Swollen coronary band, swollen claw, pus                                                                                                 |                                                                                     |
| Changes claw horn (hind legs)               | None                                                                                                                           | Very clearly visible changes like cracks, bleedings, abrasions of the wall etc., longitudinal ≥ 2 cm, round ≥ 2 cm                       |                                                                                     |
| Alterations dew claws (hind legs)           | None                                                                                                                           | Every clearly visible alteration (injuries/avulsions/bleedings/swellings) on lateral skin of dew claws, longitudinal ≥ 2 cm, round ≥ 2cm |                                                                                     |
| Lameness                                    | Normal gait/steps shortened steps and/or curved back                                                                           | Moderate lameness – reduced weight bearing on one limb                                                                                   | Severe lameness: no load on at least one limb and/or the animal can't stand up/walk |

29 Observations were recorded on paper and afterwards transferred to an Excel-sheet  
30 (Microsoft Corporation, Redmond, Washington, USA). Altogether 2,532 assessments of 449  
31 sows were conducted. From these, 355 assessments were excluded from the analysis  
32 according to predefined criteria (farrowing date initially unknown, so that sows were confined  
33 or released too early/too late: 302 assessments; crate opened earlier due to severe skin lesions  
34 of the sows: 8 assessments; other reasons for exclusion, e.g. sow deceased or excluded due to  
35 severe disease before D 2, exact number of piglets unknown, piglets weaned earlier due to  
36 health reasons: 45 assessments). All sows were identified using individual ear tags and further  
37 information (age, genetic background, etc.) were available from the herd management  
38 program “Online Sauenplaner“ (Intelicon Software Development GmbH, Heiligenkreuz am  
39 Waasen, Austria).

40
